# Supplementary material for: Surface Modification of UiO-66 on Hollow Fibre Membrane for Membrane Distillation
Source: MDPI journal article supplement (doi:10.3390/membranes13030253), 2023-02-21
Supplement: s1 [file s1]

# Surface Modification of UiO-66 on Hollow Fibre Membrane for Membrane Distillation

Noor Fadilah Yusof <sup>1</sup>, Amirul Afiat Raffi <sup>1</sup>, Nur Zhatul Shima Yahaya <sup>1</sup>, Khairul Hamimah Abas <sup>2</sup>, Mohd Hafiz Dzarfan Othman <sup>1</sup>, Juhana Jaafar <sup>1</sup> and Mukhlis A. Rahman <sup>1,\*</sup>

<sup>1</sup> Advanced Membrane Technology Research Centre (AMTEC), Universiti Teknologi Malaysia, 81310 Skudai, Johor, Malaysia.

<sup>2</sup> Department of Control & Instrumentation Engineering, School of Electrical Engineering, Universiti Teknologi Malaysia, 81310 Skudai, Johor, Malaysia.

\*Corresponding author: r-mukhlis@utm.my

Tel: +607-553-6373, Fax: +607-533-5925

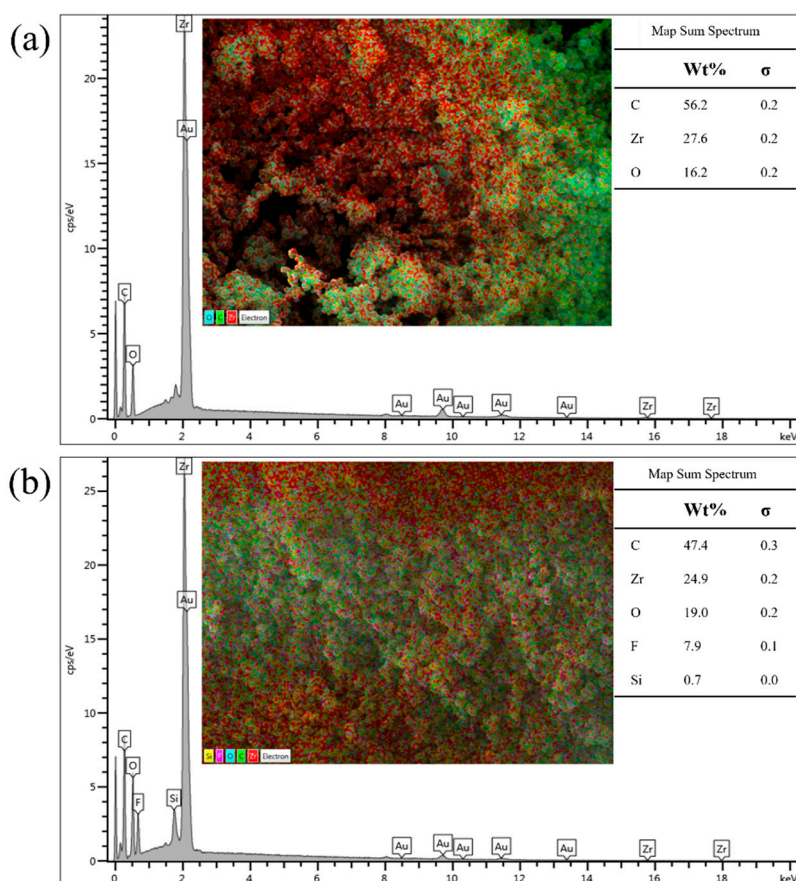

Figure S1. EDX mapping of (a) UiO-66 and (b) FAS grafted onto the UiO-66 layer

## Water flux and salt rejection calculation:

Table S1. The linear regression equation of NaCl concentration

| NaCl concentration (ppm) | Equation              |
|--------------------------|-----------------------|
| 2 - 10                   | $y = 2.62x + 3.106$   |
| 10 - 60                  | $y = 1.976x + 15.173$ |
| 20 - 100                 | $y = 2.490x + 19.65$  |
| 2000 - 10,000            | $y = 0.0016x + 0.37$  |
| 20,000 - 100,000         | $y = 0.0014x + 7.29$  |

Water flux,  $J_w = \frac{V}{t \times A}$        $V = \text{water collected (L)}$

$t = \text{time (8h)}$

$A = \text{total surface area (9.28} \times 10^{-5} \text{ m}^2\text{)}$

Salt rejection (%) =  $\left(1 - \frac{C_p}{C_F}\right) \times 100\%$

Table S2. Water flux and salt rejection calculation

| Membrane | Final        | Water     | Swept    | Initial        | Salt      | Water                 |
|----------|--------------|-----------|----------|----------------|-----------|-----------------------|
|          | conductivity | collected | liquid   | salt           | rejection | flux                  |
|          |              | (L)       | salt     | (ppm),         | (%)       | (L/m <sup>2</sup> ·h) |
|          |              |           | transfer | C <sub>F</sub> |           |                       |

| (ppm),                         |             |         |          |          |       |        |
|--------------------------------|-------------|---------|----------|----------|-------|--------|
| C <sub>P</sub>                 |             |         |          |          |       |        |
| Pristine                       | 15.79 mS/cm | 0.17888 | 26938.45 | 39292.85 | 31.44 | 240.94 |
| Al <sub>2</sub> O <sub>3</sub> |             |         |          |          |       |        |
| UiO-66                         | 13.83 mS/cm | 0.16987 | 24761.58 | 38364.28 | 35.45 | 228.80 |
| S1                             | 6.81 mS/cm  | 0.00197 | 358.81   | 37364.28 | 99.03 | 2.65   |
| S2                             | 8.4 μS/cm   | 0.00417 | 242.27   | 39721.42 | 99.39 | 5.61   |
| S3                             | 9.4 μS/cm   | 0.00581 | 206.73   | 41292.85 | 99.49 | 7.82   |
| S4                             | 4.6 μS/cm   | 0.0111  | 25.68    | 39435.71 | 99.93 | 14.95  |
| S5                             | 24.6 μS/cm  | 0.00814 | 503.91   | 37078.57 | 98.64 | 10.96  |
| U1                             | 20.7 mS/cm  | 0.00172 | 1952.11  | 39292.85 | 95.03 | 2.31   |
| U2                             | 37.9 mS/cm  | 0.0036  | 1597.43  | 39792.85 | 95.98 | 4.84   |
| U3                             | 14.6 mS/cm  | 0.0043  | 510.11   | 40578.57 | 98.74 | 5.79   |
| U4                             | 28.9 mS/cm  | 0.00644 | 764.36   | 39650    | 98.07 | 8.67   |
| U5                             | 27.11 mS/cm | 0.0074  | 619.04   | 38292.85 | 98.38 | 9.96   |

.
